RESEARCH ARTICLE

# Patient-centered primary care and self-rated health in 6 Latin American and Caribbean countries: Analysis of a public opinion cross-sectional survey

Frederico Guanais<sup>1</sup>, Svetlana V. Doubova<sup>2\*</sup>, Hannah H. Leslie<sup>3</sup>, Ricardo Perez-Cuevas<sup>4</sup>, Ezequiel García-Elorrio<sup>5</sup>, Margaret E. Kruk<sup>3</sup>

**1** Social Protection and Health Division, Inter-American Development Bank, Lima, Peru, **2** Epidemiology and Health Services Research Unit, Mexican Institute of Social Security, Mexico City, Mexico, **3** Department of Global Health and Population, Harvard T.H. Chan School of Public Health, Boston, Massachusetts, United States of America, **4** Center for Health Systems Research, National Institute of Public Health, Cuernavaca, Mexico, **5** Institute for Clinical and Health Effectiveness, Buenos Aires, Argentina

\* [svetlana.doubova@gmail.com](mailto:svetlana.doubova@gmail.com)

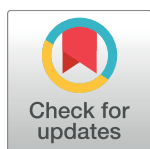

**OPEN ACCESS**

**Citation:** Guanais F, Doubova SV, Leslie HH, Perez-Cuevas R, García-Elorrio E, Kruk ME (2018) Patient-centered primary care and self-rated health in 6 Latin American and Caribbean countries: Analysis of a public opinion cross-sectional survey. *PLoS Med* 15(10): e1002673. <https://doi.org/10.1371/journal.pmed.1002673>

**Academic Editor:** Aziz Sheikh, Edinburgh University, UNITED KINGDOM

**Received:** May 21, 2018

**Accepted:** September 12, 2018

**Published:** October 9, 2018

**Copyright:** © 2018 Guanais et al. This is an open access article distributed under the terms of the [Creative Commons Attribution License](https://creativecommons.org/licenses/by/4.0/), which permits unrestricted use, distribution, and reproduction in any medium, provided the original author and source are credited.

**Data Availability Statement:** The dataset of the public opinion survey on perceptions and experiences with healthcare systems in Brazil, Colombia, El Salvador, Jamaica, Mexico, and Panama, and supporting documentation are freely available at the Publications Portal of the Inter-American Development Bank. It can be accessed at <https://publications.iadb.org/handle/11319/9095>.

**Funding:** The publication of this work was supported by the Bill & Melinda Gates Foundation

## Abstract

### Background

Despite the substantial attention to primary care (PC), few studies have addressed the relationship between patients' experience with PC and their health status in low-and middle-income countries. This study aimed to (1) test the association between overall patient-centered PC experience (OPCE) and self-rated health (SRH) and (2) identify specific features of patient-centered PC associated with better SRH (i.e., excellent or very good SRH) in 6 Latin American and Caribbean countries.

### Methods and findings

We conducted a secondary analysis of a 2013 public opinion cross-sectional survey on perceptions and experiences with healthcare systems in Brazil, Colombia, El Salvador, Jamaica, Mexico, and Panama; the data were nationally representative for urban populations. We analyzed 9 features of patient-centered PC. We calculated OPCE score as the arithmetic mean of the PC features. OPCE score ranged from 0 to 1, where 0 meant that the participant did not have any of the 9 patient-centered PC experiences, while 1 meant that he/she reported having all these experiences. After testing for interaction on the additive scale, we analyzed countries pooled for aim 1, with an interaction term for Mexico, and each country separately for aim 2. We used multiple Poisson regression models double-weighted by survey and inverse probability weights to deal with the survey design and missing data. The study included 6,100 participants. The percentage of participants with excellent or very good SRH ranged from 29.5% in Mexico to 52.4% in Jamaica. OPCE was associated with reporting excellent or very good SRH in all countries: adjusting for socio-demographic and health covariates, patients with an OPCE score of 1 in Brazil, Colombia, El Salvador, Jamaica, and Panama were more likely to report excellent or very good SRH than those

(MEK, OPP1161450). The funders had no role in study design, data collection and analysis, decision to publish, or preparation of the manuscript.

**Competing interests:** I have read the journal's policy and the authors of this manuscript have the following competing interests: FG is an employee of the Inter-American Development Bank (IDB). MEK is a member of the Editorial Board of PLOS Medicine. All other authors have declared that no competing interests exist.

**Abbreviations:** aPR, adjusted prevalence ratio; HI, health insurance; IP, inverse probability; LAC, Latin American and Caribbean; LMICs, low and middle-income countries; OPCE, overall patient-centered primary care experience; PC, primary care; RERI, relative excess risk due to interaction; SRH, self-rated health.

with a score of 0 (adjusted prevalence ratio [aPR] 1.61, 95% CI 1.37–1.90,  $p < 0.001$ ); in Mexico, this association was even stronger (aPR 4.27, 95% CI 2.34–7.81,  $p < 0.001$ ). The specific features of patient-centered PC associated with better SRH differed by country. The perception that PC providers solve most health problems was associated with excellent or very good SRH in Colombia (aPR 1.38, 95% CI 1.01–1.91,  $p = 0.046$ ) and Jamaica (aPR 1.21, 95% CI 1.02–1.43,  $p = 0.030$ ). Having a provider who knows relevant medical history was positively associated with better SRH in Mexico (aPR 1.47, 95% CI 1.03–2.12,  $p = 0.036$ ) but was negatively associated with better SRH in Brazil (aPR 0.71, 95% CI 0.56–0.89,  $p = 0.003$ ). Finally, easy contact with PC facility (Mexico: aPR 1.35, 95% CI 1.04–1.74,  $p = 0.023$ ), coordination of care (Mexico: aPR 1.53, 95% CI 1.19–1.98,  $p = 0.001$ ), and opportunity to ask questions (Brazil: aPR 1.42, 95% CI 1.11–1.83,  $p = 0.006$ ) were each associated with better SRH. The main study limitation consists in the analysis being of cross-sectional data, which does not allow making causal inferences or identifying the direction of the association between the variables.

## Conclusions

Overall, a higher OPCE score was associated with better SRH in these 6 Latin American and Caribbean countries; associations between specific characteristics of patient-centered PC and SRH differed by country. The findings underscore the importance of high-quality, patient-centered PC as a path to improved population health.

## Author summary

### Why was this study done?

- In the 40 years since the Declaration of Alma-Ata, empirical studies using ecological data have shown positive effects of access to primary care on population health outcomes, such as child mortality, adult overall mortality, and adult avoidable hospitalizations, both in high-income countries and in low- and middle-income countries (LMICs).
- In the context of LMICs, the centrality of primary care has been questioned by findings of its poor quality and its limitations in adapting to urbanization and to the epidemiological transition, as well as the increasing population demand for responsive, high-quality services.
- To our knowledge, no individual-level studies have examined the relationship between the attributes of patient-centered primary care and self-rated health (SRH) in the context of LMICs.

### What did the researchers do and find?

- Using person-level survey data representative of the urban population of 6 countries in Latin America and the Caribbean, the current study shows that individuals who reported receiving more patient-centered primary care overall were more likely to

report excellent or very good SRH status in all countries. Features of primary care associated with better SRH differed between countries.

### What do these findings mean?

- The expansion of primary care in LMICs can be informed by better evidence on which of its features—including ease of communication, comprehensiveness of care, and support for coordination of care—are associated with better self-reported health status.
- While individual-level administrative data are not yet widely available for health systems in LMICs, patient-reported survey data may serve as an instrument to assess healthcare services and to inform policy-makers in their efforts to increase the quality of primary care services.

## Introduction

Primary care (PC) has been described as being uniquely positioned to promote health and well-being at the population level [1–3]. Its central role in providing adequate, efficient, and equitable access to preventive and curative healthcare was strongly emphasized by the Declaration of Alma-Ata 40 years ago [2]. However, PC's centrality has been questioned by findings of its poor quality, especially in low- and middle-income countries (LMICs), and its limitations in adapting to urbanization and the epidemiological transition, as well as increasing population demand for responsive, high-quality services [4–6].

More recently, patient-centered healthcare has emerged as a person-oriented model of care aimed at meeting population needs, expectations, and preferences. Studies from the United States and the United Kingdom have shown the positive effect of patient-centered healthcare in improving the quality of the processes of care, reducing hospitalizations and emergency visits (and consequently healthcare costs), and improving users' satisfaction and self-management [7–9]. Within PC, a number of patient-centered healthcare attributes have been shown to be associated with perception of good healthcare quality, such as the availability of a PC provider who “knows relevant information about a patient's medical history,” “solves most of the health problems,” “spends enough time with the patient,” “coordinates healthcare,” and “is easy to communicate with” [10].

Previous work using ecological data has shown positive effects of PC on population health outcomes, such as child mortality, and avoidable hospitalizations, both in high-income countries and in LMICs [11,12]. However, despite the substantial attention and policy emphasis on PC, few studies have addressed the relationship between patient experience with PC and health in LMICs; none to our knowledge have done so with a cross-country perspective [13,14].

Self-rated health (SRH) is a broadly used measure: individuals evaluate their health status through a Likert scale or compare their health status with individuals of the same age [15]. Though SRH is a subjective indicator of health status, it has been found to be a robust predictor of mortality [15,16]; also, low SRH is associated with increased hospitalization and outpatient care in elderly populations [17]. Research studies addressing the relationship between health service characteristics and SRH have reported that in the US, individuals living in states with a higher ratio of PC physicians to population were more likely to report good SRH than

those with a lower ratio of PC physicians [18]. Enhanced accessibility and continuity of PC in the US [19,20] and high total PC quality scores in South Korea were associated with better SRH of health service users [21].

The objectives of the present study were (1) to test the association between overall patient-centered PC experience (OPCE) and SRH in 6 Latin American and Caribbean (LAC) countries and (2) to identify specific features of patient-centered PC associated with better SRH. This work can help inform financing and policies at a moment of renewed global attention to PC.

## Methods

We performed a secondary analysis of a recent (2013) public opinion survey focusing on perceptions and experiences with healthcare systems in 6 LAC countries: Brazil, Colombia, El Salvador, Jamaica, Mexico, and Panama. The detailed methodology of this survey was previously reported elsewhere [10,22,23]. In each country, the survey included a nationally representative urban sample of the population that comprised between 1,500 and 1,506 adults per country. According to the 2017 revision of *World Population Prospects* [24], the urban population constitutes the majority in these countries, ranging from 54% in Jamaica to 85% in Brazil. In total, 330 million individuals reside in urban areas in these countries.

During 2012 and 2013, Harris Interactive collected the data through telephone interviews. The sample frame for the survey consisted of random digit dialing listings of landline and mobile phone numbers in each country. The survey used an adapted version of the methodology and questionnaire that the Commonwealth Fund has been applying in Europe, Australia, Canada, and the US over the past 15 years [25]. The selection criteria considered any household member aged 18+ years. Only 1 adult per household was interviewed.

## Analysis plan

We did not have a formal prospective analysis plan. Prior to seeing the data, we identified the public opinion survey as a unique resource to test associations of healthcare quality and SRH in a representative, multi-country sample. We then reviewed the literature on patient-centered PC and identified 5 key domains (contact with clinic, time spent with provider, patient-provider communication, technical quality and solving problems, and healthcare coordination) relevant for patient-centered healthcare [10,23,25,26]; we mapped items from the survey to these domains and created single-item summaries as well as an overall score. We defined covariates based on relevance to health status and healthcare utilization. We planned to assess all countries in a pooled sample; on identifying substantial variation in the level of SRH between countries, we tested for interaction between patient-centered PC variables and country on the additive scale and report stratified models where evidence of interaction was found.

## Study variables

The dependent variable was “excellent or very good SRH,” obtained from the general SRH report and categorized as 1 = “excellent” or “very good” and 0 = “good,” “fair,” “poor,” or “not sure”.

The survey specified that PC is care provided by the doctors or other health professionals (i.e., nurses, social workers) at the family doctor’s practice or clinic. We selected items related to PC that fall into the domains of patient-centered healthcare identified in the literature [10,23,25,26] and organized them by domain:

### I. Contact with PC clinic

- PC facility is easy to contact by telephone during regular office hours

## II. Time spent with provider

- PC provider spends enough time with patient

## III. Patient–provider communication

- PC provider gives the patient an opportunity to ask questions
- PC provider explains things in a way that is easy to understand

## IV. Technical quality and solving problems

- PC provider knows relevant information about the patient’s medical history
- PC provider advises about healthy lifestyles (healthy food, regular physical activity, and possible stressors)
- Preventive exams are up to date
- PC provider solves most of the patient’s health problems

## V. Healthcare coordination

- PC provider helps to coordinate care with other physicians or sources of care

The variable “preventive exams up to date” was defined as “yes” when the respondent reported having blood pressure measurement in the last year, serum cholesterol in the last 5 years, and, for women over 40 years, cervical cytology (Pap test) and mammography in the last 3 years.

All other PC variables were measured on a 5-options Likert scale and categorized as 1 = yes (“always” or “often”) and 0 = no (“sometimes,” “rarely or never,” and “not sure”). The decision to categorize the variables this way was based on previous studies [10,23,25,26]. We calculated OPCE as the arithmetic mean of these items, following the recommendation of previous research on the use of patient experience surveys to assess service provision [27]. OPCE score ranged from 0 to 1, where 0 meant that participant did not have any of the 9 patient-centered PC experiences, while 1 meant that he/she reported having all these experiences. We assumed that each component of OPCE score contributed equally to patients’ experiences and that a difference in patient experiences had a constant effect on SRH. We maintained the 9 binary items as individual components of patient-centered PC.

Several socio-demographic and health-service-related factors are associated with poor SRH. Individual factors linked to lower health status include unhealthy lifestyle [28–30] and chronic diseases that affect mental and physical health [31–34]. Although some aspects of the relationship between socio-demographic factors and SRH are still inconclusive, it has been reported that older age, low schooling, low socio-economic status, low social capital, and low health insurance (HI) coverage are associated with poor SRH [35–37].

Based on survey data availability, we included the following covariates: sex, age, education, chronic disease, and the type of HI. The variable education defines the level of education for participants who answered the survey in all countries except El Salvador, where it describes the education of the head of the household. We identified the participant as having a chronic disease if he/she reported that a doctor had told him/her of having arthritis, asthma or chronic lung disease, cancer, diabetes, heart disease, hypertension, or depression. The type of HI was categorized as: government HI (publicly subsidized insurance not related to job affiliation), social security HI (contributory insurance related to job affiliation), and private HI (voluntary private insurance; also, in Brazil and Jamaica, those who reported having private HI provided by workplace). Furthermore, respondents reporting both government and social-security-

based HI (4.1% of participants in Colombia and 21.5% in Mexico) were grouped under social security HI. Participants who reported not having HI were placed in the government HI group, because, in all these countries, government HI is freely available for those without social security or private HI.

## Statistical analysis

We used descriptive statistics to analyze the characteristics and PC experiences of the study participants. We performed a bivariable analysis including chi-squared tests between the dependent variable (SRH) and each independent variable (PC experience) or categorical covariate. We used Student *t* tests for comparison of the continuous variable OPCE score between people who reported excellent or very good SRH and those who reported good, fair, or poor (or not sure) SRH.

The survey asked the complete set of questions about PC experiences only to respondents who affirmed “having a regular doctor or regular place for primary care.” This skip pattern results in a high percentage of missing data, given that lack of access to a regular source of PC ranged from 16.3% in Jamaica to 43.1% in El Salvador; in addition, several PC variables also had missing information (S1 Table). In sum, in the 6 countries there were 6,100 participants with complete information, which represented 67.7% of the initial sample of 9,012. Thus, we applied a double-weighted strategy with the use of survey weights to account for the survey sample design and stabilized inverse probability (IP) weights to correct for potential selection bias [38]. This technique consists in assigning a weight to individuals with complete information so that they account for themselves as well as for those with similar characteristics who had missing information. It assumes that those with missing information are similar to those with complete information who share the same measured covariates [38]. In particular, to apply this technique to adjust for the missingness induced by not having a regular PC clinic or doctor, we assumed that the PC experience of individuals without a regular PC clinic or doctor can be represented by those with a regular PC clinic or doctor conditional on the specified covariates, i.e., that there are no unmeasured confounders that are a common cause of both having access to a regular PC clinic or doctor and SRH. We first compared the number of PC visits between those with and without a regular PC clinic or doctor. We found that the mean number of visits in the last 12 months in the group with a regular doctor was 3.07 and in the group without a regular doctor was 2.09 ( $p < 0.001$ ). We then generated the denominator and numerator of the IP weights. The denominator for stabilized IP weights was the probability of having missing data conditional on the following covariates: sex, age, education, type of HI, and presence of chronic disease. The numerator was the probability of having missing data regardless of the covariates.

We used Poisson regression models with robust variance as recommended for cross-sectional studies with high-prevalence binary outcomes [39]. We initially fit pooled models across all 6 countries, and then calculated the relative excess risk due to interaction (RERI) between each country and PC experience as a measure of interaction on the additive scale [40]; additive interaction is more indicative of underlying causal interaction than interaction on the relative (ratio) scale. Where evidence of interaction was identified (RERI significant at  $p \leq 0.05$ ), we included interaction terms for country in the pooled multiple regression model, or stratified the model by country in the case of multiple interactions identified. Each multiple Poisson regression model included the dependent variable, independent variables, and conceptually relevant covariates. The pooled model included fixed effects for countries to control for country-level heterogeneity and to focus on the effect of the individual-level predictors [41,42].

Finally, we performed a sensitivity analysis in which the IP weights were calculated after the individuals without a regular PC clinic or doctor were dropped. The results were similar to those of the main analysis, suggesting that our findings were not distorted by including everyone when calculating the IP weights. All analyses were performed using the software Stata 14 and considering estimates with  $p \leq 0.05$  to be statistically significant.

## Ethical considerations

The study consists of a secondary data analysis of a public opinion survey focusing on perceptions and experiences with healthcare systems in 6 LAC countries. The survey was commissioned by the Inter-American Development Bank, and the contracted surveying firm was responsible for obtaining all necessary regulatory approvals and verifying compliance with the ethical standards of the ICC/ESOMAR Code on Market, Opinion and Social Research. The survey data for this secondary data analysis were made available by, and their use approved by, the Inter-American Development Bank.

## Results

Tables 1 and 2 present the characteristics of study participants from 6 LAC countries ( $n = 6,100$ ) double-weighted by survey and stabilized IP weights. Slightly more women than men participated in all countries (52.2% versus 47.8% in the full sample). Participants reported lower education levels in Brazil, Panama, and El Salvador (62.7%, 37.5%, and 33.4% with elementary school or less, respectively), while approximately half the sample had completed secondary school in Mexico, Colombia, and Jamaica. Government HI predominated in Brazil and Jamaica (76.5% and 61.5%, respectively), while social security HI was more common in Colombia, Panama, Mexico, and El Salvador (65.1%, 62.4%, 48.9%, and 47.4%, respectively). The proportion with private HI ranged from 9.8% in Colombia and El Salvador to 38.5% in Jamaica. Report prevalence of chronic conditions ranged from 31.5% in El Salvador to 52.2% in Jamaica. Finally, the percentage of participants with excellent or very good SRH was highest in Jamaica (52.4%), declining to a low of 29.5% in Mexico.

Tables 3 and 4 show the participants' experience with PC services in the full sample and by country. The proportion of participants who reported that the PC facility was easy to contact by telephone during regular office hours ranged from 38.1% in El Salvador to 75.2% in Jamaica. Patients from Brazil reported less frequently that the PC provider spent enough time with them (31.8%), while in Colombia this figure reached 74.2%. Regarding patient-provider communication, the opportunity to ask questions and having the PC provider explain things in a way that was easy to understand were less frequent in Brazil (58.0% and 63.9%, respectively) and more frequent in Mexico (79.5% had the opportunity to ask questions) and Colombia (81.3% received explanations in a way that was easy to understand). Relating to the technical quality of care, only 40.9% in Brazil reported that the PC provider knew relevant information about their medical history, while this figure was 75.4% in Mexico. Only between 25.9% (in Jamaica) and 44.2% (in Panama) reported that the PC provider talked about healthy lifestyles, while between 25.8% and 26% (in Panama and El Salvador) and 40.7% and 40.2% (in Brazil and Mexico) had their preventive exams up to date. The percentage of participants who considered that the PC provider solved most of their health problems ranged from 54.2% in Brazil to 80.6% in Mexico, while only from 21.8% (in Brazil) to 45.4% (in Mexico) stated that the PC provider helped to coordinate healthcare. The average OPCE score ranged from 0.44 points in Brazil to 0.63 points in Mexico.

In bivariable analyses, the average OPCE score was significantly higher in participants with excellent or very good SRH in 4 out of 6 countries. For specific features of patient-centered

Table 1. Characteristics of study population according to SRH status: 6-country sample, Brazil, Colombia, and El Salvador.

| Characteristic                      | 6-country sample |                            |                         |         | Brazil |                            |         | Colombia |                            |         | El Salvador |                            |         |
|-------------------------------------|------------------|----------------------------|-------------------------|---------|--------|----------------------------|---------|----------|----------------------------|---------|-------------|----------------------------|---------|
|                                     | Total            | Excellent or very good SRH | Good, fair, or poor SRH | p-Value | Total  | Excellent or very good SRH | p-Value | Total    | Excellent or very good SRH | p-Value | Total       | Excellent or very good SRH | p-Value |
| <b>Number of observations</b>       | 6,100            | 2,651                      | 3,449                   |         | 874    | 413                        |         | 1,009    | 407                        |         | 812         | 364                        |         |
| <b>Weighted population</b>          | 6,007            | 2,516                      | 3,491                   |         | 857    | 399                        |         | 1,000    | 404                        |         | 777         | 346                        |         |
| <b>Variables (weighted percent)</b> |                  |                            |                         |         |        |                            |         |          |                            |         |             |                            |         |
| <b>Sex</b>                          |                  |                            |                         |         |        |                            |         |          |                            |         |             |                            |         |
| Female                              | 52.2             | 37.9                       | 62.1                    | <0.001  | 50.4   | 44.3                       | 0.280   | 51.6     | 33.3                       | 0.001   | 54.6        | 42.1                       | 0.187   |
| Male                                | 47.8             | 46.2                       | 53.8                    |         | 49.6   | 48.9                       |         | 48.4     | 47.9                       |         | 45.4        | 47.6                       |         |
| <b>Age (years)</b>                  |                  |                            |                         |         |        |                            |         |          |                            |         |             |                            |         |
| 20–25                               | 21.8             | 51.9                       | 48.1                    | <0.001  | 21.1   | 59.3                       | <0.001  | 18.9     | 42.4                       | 0.569   | 26.4        | 52.9                       | 0.063   |
| 26–45                               | 43.9             | 43.3                       | 56.7                    |         | 43.9   | 58.8                       |         | 47.7     | 40.6                       |         | 41.6        | 39.4                       |         |
| 46–59                               | 20.4             | 37.2                       | 62.8                    |         | 19.9   | 28.3                       |         | 21.8     | 42.6                       |         | 18.0        | 45.7                       |         |
| ≥60                                 | 13.9             | 28.4                       | 71.6                    |         | 15.1   | 17.5                       |         | 11.6     | 31.9                       |         | 14.0        | 42.8                       |         |
| <b>Schooling</b>                    |                  |                            |                         |         |        |                            |         |          |                            |         |             |                            |         |
| Elementary school or less           | 34.4             | 37.0                       | 63.0                    | <0.001  | 62.7   | 44.3                       | 0.325   | 26.4     | 34.7                       | 0.255   | 33.4        | 43.8                       | 0.033   |
| Secondary school                    | 39.8             | 42.8                       | 57.2                    |         | 26.4   | 49.2                       |         | 51.0     | 41.4                       |         | 25.2        | 45.5                       |         |
| College                             | 18.9             | 48.4                       | 51.6                    |         | 10.7   | 53.5                       |         | 21.4     | 46.0                       |         | 20.7        | 54.0                       |         |
| Not specified                       | 6.9              | 43.5                       | 56.5                    |         | 0.2    | 63.3                       |         | 1.2      | 21.8                       |         | 20.7        | 35.2                       |         |
| <b>Health insurance</b>             |                  |                            |                         |         |        |                            |         |          |                            |         |             |                            |         |
| Government                          | 41.7             | 41.8                       | 58.2                    | <0.001  | 76.5   | 45.7                       | 0.363   | 25.1     | 41.6                       | 0.472   | 42.8        | 41.1                       | 0.020   |
| Social security                     | 37.5             | 38.3                       | 61.7                    |         | N/A    |                            |         | 65.1     | 41.2                       |         | 47.4        | 44.4                       |         |
| Private                             | 20.8             | 48.5                       | 51.5                    |         | 23.5   | 49.6                       |         | 9.8      | 32.0                       |         | 9.8         | 60.4                       |         |
| <b>Chronic disease</b>              |                  |                            |                         |         |        |                            |         |          |                            |         |             |                            |         |
| Yes                                 | 38.0             | 29.2                       | 70.8                    | <0.001  | 33.6   | 22.5                       | <0.001  | 32.9     | 27.0                       | <0.001  | 31.5        | 34.6                       | 0.001   |
| No                                  | 62.0             | 49.6                       | 50.4                    |         | 66.4   | 58.8                       |         | 67.1     | 47.0                       |         | 68.5        | 49.2                       |         |
| <b>Excellent or very good SRH</b>   |                  | 41.9                       | 58.1                    |         |        | 46.6                       |         |          | 40.4                       |         |             | 44.6                       |         |

Weighted percent values are double-weighted by stabilized inverse probability weights and survey weights. *p*-Values are for chi-squared test between SRH and each covariate.

SRH, self-rated health.

<https://doi.org/10.1371/journal.pmed.1002673.t001>

PC, the proportion of respondents with excellent or very good SRH was significantly higher among those who had a PC facility that was easy to contact in Colombia, El Salvador, and Mexico; who reported that the PC provider spent enough time with them in Colombia and Mexico; who had the opportunity to ask questions in Brazil, Colombia, and Mexico; who had a PC provider who explained things in a way that was easy to understand in Brazil, Colombia, Jamaica, and Mexico; who perceived that the PC provider knew relevant information about their medical history in Colombia, Jamaica, and Mexico; who considered that PC provider solved most of their health problems in Brazil, Colombia, Jamaica, and Mexico; and who reported that PC provider coordinated care with other providers or sources of care in Colombia, El Salvador, Jamaica, and Mexico.



Table 2. Characteristics of the population according to SRH status: Jamaica, Mexico, and Panama.

| Characteristic                      | Jamaica |                            |         | Mexico |                            |         | Panama |                            |         |
|-------------------------------------|---------|----------------------------|---------|--------|----------------------------|---------|--------|----------------------------|---------|
|                                     | Total   | Excellent or very good SRH | p-Value | Total  | Excellent or very good SRH | p-Value | Total  | Excellent or very good SRH | p-Value |
| <b>Number of observations</b>       | 1,140   | 602                        |         | 1,182  | 414                        |         | 1,083  | 451                        |         |
| <b>Weighted population</b>          | 1,142   | 598                        |         | 1,173  | 346                        |         | 1,058  | 421                        |         |
| <b>Variables (weighted percent)</b> |         |                            |         |        |                            |         |        |                            |         |
| <b>Sex</b>                          |         |                            |         |        |                            |         |        |                            |         |
| Female                              | 53.3    | 46.5                       | <0.001  | 51.8   | 26.4                       | 0.083   | 51.6   | 37.1                       | 0.147   |
| Male                                | 46.7    | 59.1                       |         | 48.2   | 32.9                       |         | 48.4   | 42.6                       |         |
| <b>Age (years)</b>                  |         |                            |         |        |                            |         |        |                            |         |
| 20–25                               | 22.1    | 51.1                       | 0.146   | 23.8   | 47.2                       | <0.001  | 19.2   | 60.9                       | <0.001  |
| 26–45                               | 42.4    | 55.1                       |         | 47.1   | 28.1                       |         | 39.8   | 42.0                       |         |
| 46–59                               | 19.4    | 55.2                       |         | 21.8   | 21.4                       |         | 20.8   | 33.5                       |         |
| ≥60                                 | 16.1    | 43.8                       |         | 7.3    | 5.4                        |         | 20.2   | 21.8                       |         |
| <b>Schooling</b>                    |         |                            |         |        |                            |         |        |                            |         |
| Elementary school or less           | 25.9    | 48.7                       | 0.499   | 26.4   | 22.3                       | 0.017   | 37.5   | 26.8                       | <0.001  |
| Secondary school                    | 48.2    | 52.8                       |         | 53.1   | 29.3                       |         | 27.2   | 47.9                       |         |
| College                             | 19.3    | 54.3                       |         | 18.2   | 36.6                       |         | 22.5   | 49.6                       |         |
| Not specified                       | 6.6     | 58.1                       |         | 2.3    | 60.5                       |         | 12.8   | 43.4                       |         |
| <b>Health insurance</b>             |         |                            |         |        |                            |         |        |                            |         |
| Government                          | 61.5    | 48.5                       | 0.004   | 33.1   | 26.7                       | 0.389   | 16.7   | 35.8                       | 0.431   |
| Social security                     | N/A     |                            |         | 48.9   | 29.7                       |         | 62.4   | 39.4                       |         |
| Private                             | 38.5    | 58.6                       |         | 18.0   | 34.1                       |         | 20.9   | 44.1                       |         |
| <b>Chronic disease</b>              |         |                            |         |        |                            |         |        |                            |         |
| Yes                                 | 52.2    | 42.0                       | <0.001  | 35.5   | 15.7                       | <0.001  | 38.4   | 27.8                       | <0.001  |
| No                                  | 47.8    | 63.8                       |         | 64.5   | 37.1                       |         | 61.6   | 47.3                       |         |
| <b>Excellent or very good SRH</b>   |         | 52.4                       |         |        | 29.5                       |         |        | 39.8                       |         |

Weighted percent values are double-weighted by stabilized inverse probability weights and survey weights. *p*-Values are for chi-squared test between SRH and each covariate.

N/A, no applicable; SRH, self-rated health.

<https://doi.org/10.1371/journal.pmed.1002673.t002>

Table 5 shows the results of the pooled multiple Poisson regression model double-weighted by survey and stabilized IP weights to test the association of OPCE score with excellent or very good SRH. The coefficients represent prevalence ratios of the report of excellent or very good SRH; their interpretation is the same as for risk ratios. Assessment of interaction between countries and OPCE score identified a significant positive interaction in Mexico (RERI 0.55, 95% CI 0.09–1.02, *p* = 0.019) (S2 Table); we included an interaction term in the analytic model (Table 5). After adjustment for socio-demographic and health covariates, in all countries except Mexico, patients with an OPCE score of 1 were 1.6 times (95% CI 1.37–1.90, *p* < 0.001) as likely to report excellent or very good SRH as those with a score of 0. The association was significantly stronger in Mexico: incorporating the interaction term, patients with an OPCE score of 1 had a 4.27 (95% CI 2.34–7.81, *p* < 0.001) times higher probability of reporting excellent or very good SRH compared to those with an OPCE score of 0.

Tables 6 and 7 depict the association of specific PC patient experiences with excellent or very good SRH. We found evidence of multiple interactions between countries and specific features of patient-centered PC (S2 Table); we thus present results stratified by country (Tables

Table 3. Patients' experience with PC according to SRH status: 6-country sample, Brazil, Colombia, and El Salvador.

| Domain and variable (weighted percent)                                                                         | 6-country sample |                            |                         |         | Brazil           |                            |         | Colombia         |                            |         | El Salvador      |                            |         |
|----------------------------------------------------------------------------------------------------------------|------------------|----------------------------|-------------------------|---------|------------------|----------------------------|---------|------------------|----------------------------|---------|------------------|----------------------------|---------|
|                                                                                                                | Total            | Excellent or very good SRH | Good, fair, or poor SRH | p-Value | Total            | Excellent or very good SRH | p-Value | Total            | Excellent or very good SRH | p-Value | Total            | Excellent or very good SRH | p-Value |
| Number of observations                                                                                         | 6,100            | 2,651                      | 3,449                   |         | 874              | 413                        |         | 1,009            | 407                        |         | 812              | 364                        |         |
| Weighted population                                                                                            | 6,007            | 2,516                      | 3,491                   |         | 857              | 399                        |         | 1,000            | 404                        |         | 777              | 346                        |         |
| <b>I. Contact with PC clinic</b>                                                                               |                  |                            |                         |         |                  |                            |         |                  |                            |         |                  |                            |         |
| PC facility is easy to contact by telephone during regular office hours                                        |                  |                            |                         |         |                  |                            |         |                  |                            |         |                  |                            |         |
| Yes                                                                                                            | 50.9             | 46.9                       | 53.1                    | <0.001  | 50.3             | 46.6                       | 0.945   | 44.1             | 46.5                       | 0.010   | 38.1             | 52.9                       | 0.006   |
| No                                                                                                             | 42.0             | 36.7                       | 63.3                    |         | 42.6             | 47.0                       |         | 40.2             | 32.0                       |         | 57.0             | 39.0                       |         |
| Never tried to contact PC facility                                                                             | 7.1              | 36.5                       | 63.5                    |         | 7.1              | 44.1                       |         | 15.7             | 45.0                       |         | 4.9              | 44.3                       |         |
| <b>II. Time spent with provider</b>                                                                            |                  |                            |                         |         |                  |                            |         |                  |                            |         |                  |                            |         |
| PC provider spends enough time with patient                                                                    |                  |                            |                         |         |                  |                            |         |                  |                            |         |                  |                            |         |
| Yes                                                                                                            | 59.6             | 43.8                       | 56.2                    | 0.005   | 31.8             | 49.5                       | 0.331   | 74.2             | 43.3                       | 0.023   | 60.4             | 46.8                       | 0.178   |
| No                                                                                                             | 40.4             | 39.1                       | 60.9                    |         | 68.2             | 45.3                       |         | 25.8             | 32.2                       |         | 39.6             | 41.1                       |         |
| <b>III. Patient-provider communication</b>                                                                     |                  |                            |                         |         |                  |                            |         |                  |                            |         |                  |                            |         |
| PC provider gives an opportunity to ask questions                                                              |                  |                            |                         |         |                  |                            |         |                  |                            |         |                  |                            |         |
| Yes                                                                                                            | 71.4             | 43.8                       | 56.2                    | <0.001  | 58.0             | 53.8                       | <0.001  | 77.5             | 43.9                       | 0.004   | 70.2             | 45.4                       | 0.526   |
| No                                                                                                             | 28.6             | 37.0                       | 63.0                    |         | 42.0             | 36.7                       |         | 22.5             | 28.3                       |         | 29.8             | 42.6                       |         |
| PC provider explains things in a way that is easy to understand                                                |                  |                            |                         |         |                  |                            |         |                  |                            |         |                  |                            |         |
| Yes                                                                                                            | 73.3             | 44.1                       | 55.9                    | <0.001  | 63.9             | 51.2                       | 0.005   | 81.3             | 43.1                       | 0.008   | 71.2             | 45.7                       | 0.424   |
| No                                                                                                             | 26.7             | 35.9                       | 64.1                    |         | 36.1             | 38.6                       |         | 18.7             | 28.7                       |         | 28.8             | 41.9                       |         |
| <b>IV. Technical quality and solving problems</b>                                                              |                  |                            |                         |         |                  |                            |         |                  |                            |         |                  |                            |         |
| PC provider always or often knows relevant information about the patient's medical history                     |                  |                            |                         |         |                  |                            |         |                  |                            |         |                  |                            |         |
| Yes                                                                                                            | 66.0             | 43.1                       | 56.9                    | 0.042   | 40.9             | 42.5                       | 0.105   | 74.4             | 43.4                       | 0.032   | 67.3             | 46.2                       | 0.260   |
| No                                                                                                             | 34.0             | 39.5                       | 60.5                    |         | 59.1             | 49.4                       |         | 25.6             | 31.6                       |         | 32.7             | 41.2                       |         |
| PC provider advises about healthy lifestyles (healthy food, regular physical activity, and possible stressors) |                  |                            |                         |         |                  |                            |         |                  |                            |         |                  |                            |         |
| Yes                                                                                                            | 35.5             | 41.4                       | 58.6                    | 0.631   | 28.6             | 46.5                       | 0.977   | 28.5             | 43.9                       | 0.322   | 42.1             | 47.2                       | 0.264   |
| No                                                                                                             | 64.5             | 42.2                       | 57.8                    |         | 71.4             | 46.7                       |         | 71.5             | 39.0                       |         | 57.9             | 42.7                       |         |
| Preventive exams up to date                                                                                    |                  |                            |                         |         |                  |                            |         |                  |                            |         |                  |                            |         |
| Yes                                                                                                            | 33.0             | 40.5                       | 59.5                    | 0.239   | 40.7             | 42.5                       | 0.103   | 31.4             | 43.9                       | 0.294   | 26.0             | 40.7                       | 0.259   |
| No                                                                                                             | 67.0             | 42.6                       | 57.4                    |         | 59.3             | 49.4                       |         | 68.6             | 38.8                       |         | 74.0             | 45.9                       |         |
| PC provider solves most of the patient's health problems                                                       |                  |                            |                         |         |                  |                            |         |                  |                            |         |                  |                            |         |
| Yes                                                                                                            | 69.6             | 44.3                       | 55.7                    | <0.001  | 54.2             | 51.1                       | 0.021   | 74.8             | 45.3                       | <0.001  | 71.7             | 46.6                       | 0.136   |
| No                                                                                                             | 30.4             | 36.5                       | 63.5                    |         | 45.8             | 41.3                       |         | 25.2             | 25.9                       |         | 28.3             | 39.6                       |         |
| <b>V. Healthcare coordination</b>                                                                              |                  |                            |                         |         |                  |                            |         |                  |                            |         |                  |                            |         |
| PC provider always or often helps to coordinate care with other physicians or sources of care                  |                  |                            |                         |         |                  |                            |         |                  |                            |         |                  |                            |         |
| Yes                                                                                                            | 36.3             | 46.1                       | 53.9                    | 0.001   | 21.8             | 56.0                       | 0.692   | 40.4             | 46.2                       | 0.030   | 40.9             | 52.5                       | 0.007   |
| No                                                                                                             | 57.6             | 39.6                       | 60.4                    |         | 77.9             | 47.3                       |         | 46.0             | 39.2                       |         | 55.6             | 39.3                       |         |
| Not necessary to coordinate care                                                                               | 6.1              | 38.3                       | 61.7                    |         | 0.3              | 57.8                       |         | 13.6             | 27.3                       |         | 3.5              | 35.7                       |         |
| OPCE score, mean (95% CI)                                                                                      | 0.56 (0.55–0.57) | 0.58 (0.57–0.60)           | 0.54 (0.53–0.55)        | <0.001  | 0.44 (0.41–0.46) | 0.45 (0.42–0.48)           | 0.177   | 0.60 (0.58–0.62) | 0.65 (0.62–0.68)           | <0.001  | 0.55 (0.52–0.57) | 0.58 (0.55–0.61)           | 0.014   |

Weighted percent values are double-weighted by stabilized inverse probability weights and survey weights. *p*-Values are for chi-squared test between SRH and each independent variable, or Student *t* test for comparison of OPCE score between people who reported excellent or very good SRH and those who reported good, fair, or poor (or not sure) SRH.

OPCE, overall patient-centered primary care experience; PC, primary care; SRH, self-rated health.

<https://doi.org/10.1371/journal.pmed.1002673.t003>

Table 4. Patients' experience with PC according to SRH status: Jamaica, Mexico, and Panama.

| Domain and variable (weighted percent)                                                                         | Jamaica          |                            |         | Mexico           |                            |         | Panama           |                            |         |
|----------------------------------------------------------------------------------------------------------------|------------------|----------------------------|---------|------------------|----------------------------|---------|------------------|----------------------------|---------|
|                                                                                                                | Total            | Excellent or very good SRH | p-Value | Total            | Excellent or very good SRH | p-Value | Total            | Excellent or very good SRH | p-Value |
| <b>Number of observations</b>                                                                                  | 1,140            | 602                        |         | 1,182            | 414                        |         | 1,083            | 451                        |         |
| <b>Weighted population</b>                                                                                     | 1,142            | 598                        |         | 1,173            | 346                        |         | 1,058            | 421                        |         |
| <b>I. Contact with PC clinic</b>                                                                               |                  |                            |         |                  |                            |         |                  |                            |         |
| PC facility is easy to contact by telephone during regular office hours                                        |                  |                            |         |                  |                            |         |                  |                            |         |
| Yes                                                                                                            | 75.2             | 54.1                       | 0.218   | 45.8             | 37.3                       | <0.001  | 46.4             | 42.0                       | 0.284   |
| No                                                                                                             | 23.8             | 46.8                       |         | 45.6             | 23.9                       |         | 48.2             | 38.9                       |         |
| Never tried to contact PC facility                                                                             | 1.0              | 61.3                       |         | 8.6              | 18.0                       |         | 5.4              | 28.4                       |         |
| <b>II. Time spent with provider</b>                                                                            |                  |                            |         |                  |                            |         |                  |                            |         |
| PC provider spends enough time with patient                                                                    |                  |                            |         |                  |                            |         |                  |                            |         |
| Yes                                                                                                            | 58.0             | 55.1                       | 0.070   | 73.8             | 33.5                       | <0.001  | 53.8             | 41.6                       | 0.323   |
| No                                                                                                             | 42.0             | 48.7                       |         | 26.2             | 18.3                       |         | 46.2             | 37.7                       |         |
| <b>III. Patient-provider communication</b>                                                                     |                  |                            |         |                  |                            |         |                  |                            |         |
| PC provider gives an opportunity to ask questions                                                              |                  |                            |         |                  |                            |         |                  |                            |         |
| Yes                                                                                                            | 63.9             | 56.0                       | 0.007   | 79.5             | 32.0                       | 0.019   | 76.6             | 39.2                       | 0.548   |
| No                                                                                                             | 36.1             | 45.9                       |         | 20.5             | 20.0                       |         | 23.4             | 41.8                       |         |
| PC provider explains things in a way that is easy to understand                                                |                  |                            |         |                  |                            |         |                  |                            |         |
| Yes                                                                                                            | 67.6             | 56.8                       | <0.001  | 78.3             | 33.8                       | <0.001  | 75.7             | 38.6                       | 0.273   |
| No                                                                                                             | 32.4             | 43.2                       |         | 21.7             | 14.2                       |         | 24.3             | 43.6                       |         |
| <b>IV. Technical quality and solving problems</b>                                                              |                  |                            |         |                  |                            |         |                  |                            |         |
| PC provider always or often knows relevant information about the patient's medical history                     |                  |                            |         |                  |                            |         |                  |                            |         |
| Yes                                                                                                            | 58.6             | 55.7                       | 0.025   | 75.4             | 33.7                       | <0.001  | 75.3             | 40.8                       | 0.349   |
| No                                                                                                             | 41.4             | 47.7                       |         | 24.6             | 16.9                       |         | 24.7             | 36.7                       |         |
| PC provider advises about healthy lifestyles (healthy food, regular physical activity, and possible stressors) |                  |                            |         |                  |                            |         |                  |                            |         |
| Yes                                                                                                            | 25.9             | 48.2                       | 0.157   | 43.6             | 30.3                       | 0.696   | 44.2             | 40.7                       | 0.680   |
| No                                                                                                             | 74.1             | 53.9                       |         | 56.4             | 28.9                       |         | 55.8             | 39.1                       |         |
| Preventive exams up to date                                                                                    |                  |                            |         |                  |                            |         |                  |                            |         |
| Yes                                                                                                            | 33.0             | 55.8                       | 0.186   | 40.2             | 25.8                       | 0.108   | 25.8             | 38.3                       | 0.629   |
| No                                                                                                             | 67.0             | 50.7                       |         | 59.8             | 32.0                       |         | 74.2             | 40.3                       |         |
| PC provider solves most of the patient's health problems                                                       |                  |                            |         |                  |                            |         |                  |                            |         |
| Yes                                                                                                            | 59.0             | 58.4                       | <0.001  | 80.6             | 32.7                       | <0.001  | 74.6             | 39.3                       | 0.671   |
| No                                                                                                             | 41.0             | 43.8                       |         | 19.4             | 16.5                       |         | 25.4             | 41.2                       |         |
| <b>V. Healthcare coordination</b>                                                                              |                  |                            |         |                  |                            |         |                  |                            |         |
| PC provider always or often helps to coordinate care with other physicians or sources of care                  |                  |                            |         |                  |                            |         |                  |                            |         |
| Yes                                                                                                            | 31.4             | 56.9                       | 0.025   | 45.4             | 37.6                       | <0.001  | 36.1             | 43.5                       | 0.282   |
| No                                                                                                             | 63.6             | 49.2                       |         | 46.7             | 19.7                       |         | 59.0             | 38.1                       |         |
| Not necessary to coordinate care                                                                               | 5.0              | 64.8                       |         | 7.9              | 41.2                       |         | 4.9              | 33.7                       |         |
| <b>OPCE score, mean (95% CI)</b>                                                                               | 0.53 (0.51–0.55) | 0.56 (0.54–0.59)           | <0.001  | 0.63 (0.61–0.65) | 0.71 (0.68–0.74)           | <0.001  | 0.57 (0.55–0.59) | 0.58 (0.55–0.61)           | 0.603   |

Weighted percent values are double-weighted by stabilized inverse probability weights and survey weights. *p*-Values are for chi-squared test between SRH and each independent variable, or Student *t* test for comparison of OPCE score between people who reported excellent or very good SRH and those who reported good, fair, or poor (or not sure) SRH.

OPCE, overall patient-centered primary care experience; PC, primary care; SRH, self-rated health.

<https://doi.org/10.1371/journal.pmed.1002673.t004>

**Table 5. Association of OPCE score with excellent and very good self-rated health ( $n = 6,100$ ).**

| Variable                                              | aPR (95% CI)            | p-Value |
|-------------------------------------------------------|-------------------------|---------|
| <b>OPCE score</b>                                     | <b>1.61 (1.37–1.90)</b> | <0.001  |
| <b>Interaction term between Mexico and OPCE score</b> | <b>2.65 (1.42–4.95)</b> | 0.002   |
| <b>Covariates</b>                                     |                         |         |
| <b>Female</b>                                         | <b>0.88 (0.82–0.95)</b> | 0.001   |
| <b>Age (years)</b>                                    |                         |         |
| 26–45                                                 | <b>0.85 (0.78–0.93)</b> | <0.001  |
| 46–59                                                 | <b>0.80 (0.72–0.90)</b> | <0.001  |
| ≥60                                                   | <b>0.64 (0.54–0.75)</b> | <0.001  |
| <b>Education</b>                                      |                         |         |
| Elementary school or less                             | Ref                     |         |
| Secondary school                                      | 0.99 (0.89–1.11)        | 0.924   |
| College                                               | 1.12 (0.99–1.25)        | 0.053   |
| Not specified                                         | 1.02 (0.86–1.20)        | 0.839   |
| <b>Health insurance</b>                               |                         |         |
| Government                                            | Ref                     |         |
| Social security                                       | 1.04 (0.92–1.17)        | 0.509   |
| Private                                               | 1.05 (0.95–1.15)        | 0.316   |
| <b>Chronic disease</b>                                | <b>0.61 (0.56–0.68)</b> | <0.001  |
| <b>Country</b>                                        |                         |         |
| Brazil                                                | <b>1.25 (1.08–1.44)</b> | 0.003   |
| Colombia                                              | 0.96 (0.83–1.11)        | 0.621   |
| El Salvador                                           | 1.08 (0.95–1.23)        | 0.216   |
| Jamaica                                               | <b>1.45 (1.27–1.65)</b> | <0.001  |
| Mexico                                                | <b>0.36 (0.22–0.58)</b> | <0.001  |
| Panama                                                | Ref                     |         |

All prevalence ratios were adjusted by the covariates presented in this table. Bold values highlight the statistically significant aPRs.

aPR, adjusted prevalence ratio; OPCE, overall patient-centered primary care experience; PC, primary care; SRH, self-rated health.

<https://doi.org/10.1371/journal.pmed.1002673.t005>

6 and 7). The analysis revealed differences among countries in patient experiences associated with a high probability of having excellent or very good SRH, when controlling for the study covariates. After adjustment for socio-demographic and health characteristics, the experience of easy contact with the PC facility by telephone during regular office hours was associated with excellent or very good SRH in Mexico (aPR 1.35, 95% CI 1.04–1.74,  $p = 0.023$ ), the perception that the PC provider gives an opportunity to ask questions was associated with excellent or very good SRH in Brazil (aPR 1.42, 95% CI 1.11–1.83,  $p = 0.006$ ), having a PC provider who knows relevant information about the patient’s medical history was associated with excellent or very good SRH in Mexico (aPR 1.47, 95% CI 1.03–2.12,  $p = 0.036$ ) but was negatively associated with excellent or very good SRH in Brazil (aPR 0.71, 95% CI 0.56–0.89,  $p = 0.003$ ), the perception that the PC provider solves most of the patient’s health problems was associated with excellent or very good SRH in Colombia (aPR 1.38, 95% CI 1.01–1.91,  $p = 0.046$ ) and in Jamaica (aPR 1.21, 95% CI 1.02–1.43,  $p = 0.030$ ), and coordination of care by the PC provider was associated with excellent or very good SRH in Mexico (aPR 1.53, 95% CI 1.19–1.98,  $p = 0.001$ ). After adjustment for covariates, no individual features of patient-centered PC were associated with excellent or very good SRH in El Salvador or Panama.

**Table 6. Association of specific PC patient experiences with excellent or very good self-rated health: Brazil, Colombia, and El Salvador.**

| Domain and variable                                                                    | Brazil<br>n = 874       |         | Colombia<br>n = 1,009   |         | El Salvador<br>n = 812  |         |
|----------------------------------------------------------------------------------------|-------------------------|---------|-------------------------|---------|-------------------------|---------|
|                                                                                        | aPR (95% CI)            | p-Value | aPR (95% CI)            | p-Value | aPR (95% CI)            | p-Value |
| <b>I. Contact with clinic</b>                                                          |                         |         |                         |         |                         |         |
| PC facility is easy to contact by telephone during regular office hours                |                         |         |                         |         |                         |         |
| Yes                                                                                    | 1.04 (0.85–1.27)        | 0.680   | 1.25 (0.98–1.61)        | 0.072   | 1.18 (0.98–1.42)        | 0.089   |
| No                                                                                     | Ref                     |         | Ref                     |         | Ref                     |         |
| Never tried to contact PC facility                                                     | 0.90 (0.67–1.20)        | 0.472   | <b>1.39 (1.00–1.92)</b> | 0.049   | 1.10 (0.73–1.67)        | 0.647   |
| <b>II. Time spent with provider</b>                                                    |                         |         |                         |         |                         |         |
| PC provider spends enough time with patient                                            | 1.08 (0.89–1.31)        | 0.448   | 1.01 (0.76–1.34)        | 0.969   | 1.01 (0.78–1.29)        | 0.945   |
| <b>III. Patient–provider communication</b>                                             |                         |         |                         |         |                         |         |
| PC provider gives an opportunity to ask questions                                      | <b>1.42 (1.11–1.83)</b> | 0.006   | 1.10 (0.77–1.57)        | 0.591   | 0.93 (0.71–1.22)        | 0.607   |
| PC provider explains things in a way that is easy to understand                        | 1.09 (0.85–1.39)        | 0.497   | 1.08 (0.78–1.49)        | 0.641   | 0.97 (0.71–1.34)        | 0.878   |
| <b>IV. Technical quality and solving problems</b>                                      |                         |         |                         |         |                         |         |
| PC provider knows relevant information about the patient’s medical history             | <b>0.71 (0.56–0.89)</b> | 0.003   | 1.08 (0.79–1.47)        | 0.649   | 0.78 (0.79–1.34)        | 0.887   |
| PC provider advises about healthy lifestyles (nutrition, physical activity, stressors) | 1.10 (0.93–1.30)        | 0.253   | 1.12 (0.89–1.40)        | 0.322   | 1.11 (0.93–1.34)        | 0.240   |
| Preventive exams up to date                                                            | 1.02 (0.83–1.25)        | 0.852   | 0.97 (0.76–1.23)        | 0.790   | 0.83 (0.67–1.05)        | 0.118   |
| PC provider solves most of the patient’s health problems                               | 1.14 (0.93–1.38)        | 0.205   | <b>1.38 (1.01–1.91)</b> | 0.046   | 1.16 (0.87–1.55)        | 0.295   |
| <b>V. Care coordination</b>                                                            |                         |         |                         |         |                         |         |
| PC provider helps to coordinate care with other physicians or sources of care          |                         |         |                         |         |                         |         |
| Yes                                                                                    | 0.89 (0.70–1.13)        | 0.330   | 0.98 (0.78–1.23)        | 0.855   | 1.17 (0.98–1.41)        | 0.088   |
| No                                                                                     | Ref                     |         | Ref                     |         | Ref                     |         |
| It was not necessary to coordinate care                                                | 1.18 (0.55–2.52)        | 0.673   | 0.66 (0.42–1.02)        | 0.064   | 0.90 (0.49–1.64)        | 0.734   |
| <b>Covariates</b>                                                                      |                         |         |                         |         |                         |         |
| <b>Female</b>                                                                          |                         |         |                         |         |                         |         |
|                                                                                        | 1.01 (0.85–1.22)        | 0.849   | <b>0.76 (0.61–0.95)</b> | 0.018   | 0.91 (0.76–1.10)        | 0.345   |
| <b>Age (years)</b>                                                                     |                         |         |                         |         |                         |         |
| 18–25                                                                                  | Ref                     |         | Ref                     |         | Ref                     |         |
| 26–45                                                                                  | 0.98 (0.80–1.19)        | 0.839   | 1.05 (0.82–1.36)        | 0.685   | <b>0.79 (0.64–0.98)</b> | 0.030   |
| 46–59                                                                                  | <b>0.60 (0.42–0.85)</b> | 0.004   | 1.20 (0.88–1.64)        | 0.248   | 0.99 (0.77–1.28)        | 0.968   |
| ≥60                                                                                    | <b>0.39 (0.23–0.66)</b> | 0.001   | 1.02 (0.62–1.69)        | 0.926   | 0.92 (0.68–1.23)        | 0.570   |
| <b>Education</b>                                                                       |                         |         |                         |         |                         |         |
| Elementary school or less                                                              | Ref                     |         | Ref                     |         | Ref                     |         |
| Secondary school                                                                       | 0.90 (0.75–1.07)        | 0.243   | 1.08 (0.76–1.52)        | 0.679   | 0.97 (0.76–1.24)        | 0.835   |
| College                                                                                | 1.04 (0.79–1.39)        | 0.763   | 1.24 (0.86–1.78)        | 0.251   | 1.11 (0.89–1.38)        | 0.370   |
| Not specified                                                                          | 1.23 (0.63–2.41)        | 0.545   | 0.56 (0.16–2.02)        | 0.378   | 0.79 (0.59–1.07)        | 0.130   |
| <b>Health insurance</b>                                                                |                         |         |                         |         |                         |         |
| Government                                                                             | Ref                     |         | Ref                     |         | Ref                     |         |
| Social security                                                                        | N/A                     |         | 0.98 (0.75–1.29)        | 0.910   | 1.03 (0.84–1.26)        | 0.767   |
| Private                                                                                | 1.14 (0.91–1.44)        | 0.251   | 0.71 (0.46–1.08)        | 0.110   | <b>1.31 (1.03–1.68)</b> | 0.029   |

(Continued)

Table 6. (Continued)

| Domain and variable       | Brazil<br><i>n</i> = 874 |                 | Colombia<br><i>n</i> = 1,009 |                 | El Salvador<br><i>n</i> = 812 |                 |
|---------------------------|--------------------------|-----------------|------------------------------|-----------------|-------------------------------|-----------------|
|                           | aPR (95% CI)             | <i>p</i> -Value | aPR (95% CI)                 | <i>p</i> -Value | aPR (95% CI)                  | <i>p</i> -Value |
| Chronic disease diagnosis | <b>0.53 (0.40–0.71)</b>  | <0.001          | <b>0.65 (0.48–0.87)</b>      | 0.004           | <b>0.72 (0.58–0.90)</b>       | 0.004           |

Multiple Poisson regression models double-weighted by survey and stabilized inverse variance weights and stratified by country. All prevalence ratios were adjusted by the covariates presented in this table. Bold values highlight the statistically significant aPRs.

aPR, adjusted prevalence ratio; PC, primary care.

<https://doi.org/10.1371/journal.pmed.1002673.t006>

## Discussion

This secondary analysis of a nationally representative survey of the urban population in 6 LAC countries found that higher OPCE was associated with excellent or very good SRH. At the same time, the specific features of patient-centered PC associated with excellent or very good SRH differed among countries, with features from the domains of contact with clinic, communication, technical quality, and coordination showing significant associations in at least 1 country. The findings underscore the importance of high-quality, patient-centered PC as a path to improved population health while identifying areas for future country-specific investigation.

Overall scores are considered a valid alternative to global ratings in patient experience surveys [27]. To our knowledge there were at least 2 previous studies in the US and South Korea that investigated the association between overall PC quality metrics and SRH [20,21]. The first study utilized summary metrics of accessibility, interpersonal relationships, and continuity, while the second included first contact, personalized care, coordination function, comprehensiveness, and family/community orientation. Both measures showed a positive association between better PC experience and better SRH. Consistent with these 2 studies, we found a significant association of the average OPCE score with excellent or very good SRH in the context of LMICs in the LAC region.

Interestingly, we found that in Mexico patients with an OPCE score of 1 had a 4.27 times higher probability of reporting excellent or very good SRH compared to those with an OPCE score of 0. Also, we found that the overall SRH in Mexico was substantially lower than in the other countries, and the factors that explain this difference might also help us understand why the relationship of SRH with patient-centered PC is stronger in Mexico. Further country-specific research would be needed to identify such factors.

While broad policy statements on the centrality of PC for achieving health for all are important [2], these often lack the specific guidance to policy-makers who intend to pursue health system reform and introduce PC orientation within their health systems. Thus, detailed knowledge on specific patient experiences associated with better SRH (i.e., excellent or very good SRH) is important to identify priority areas for improvement in the delivery of healthcare, together with further assessments with longitudinal or experimental data [43]. In our study, PC features associated with excellent or very good SRH varied among countries. Two countries (El Salvador and Panama) showed no significant associations for the individual features of patient-centered PC, suggesting that the totality of the experience was more salient than any component within it. In Mexico, having a facility easy to contact by telephone, having a provider who knows relevant information about the patient’s medical history, and having a provider who coordinates healthcare were associated with better SRH. Having a PC provider who gives an opportunity to ask questions was associated with better SRH in Brazil, and having a

Table 7. Association of specific PC patient experiences with excellent or very good self-rated health: Jamaica, Mexico, and Panama.

| Domain and variable                                                                    | Jamaica<br>n = 1,140    |         | Mexico<br>n = 1,182     |         | Panama<br>n = 1,083     |         |
|----------------------------------------------------------------------------------------|-------------------------|---------|-------------------------|---------|-------------------------|---------|
|                                                                                        | aPR (95% CI)            | p-Value | aPR (95% CI)            | p-Value | aPR (95% CI)            | p-Value |
| <b>I. Contact with clinic</b>                                                          |                         |         |                         |         |                         |         |
| PC facility is easy to contact by telephone during regular office hours                |                         |         |                         |         |                         |         |
| Yes                                                                                    | 0.99 (0.83–1.19)        | 0.938   | <b>1.35 (1.04–1.74)</b> | 0.023   | 1.06 (0.88–1.27)        | 0.550   |
| No                                                                                     | Ref                     |         | Ref                     |         | Ref                     |         |
| Never tried to contact PC facility                                                     | 1.05 (0.57–1.94)        | 0.862   | 0.89 (0.51–1.53)        | 0.663   | 0.79 (0.46–1.36)        | 0.397   |
| <b>II. Time spent with provider</b>                                                    |                         |         |                         |         |                         |         |
| PC provider spends enough time with patient                                            | 0.94 (0.80–1.11)        | 0.504   | 1.14 (0.83–1.57)        | 0.437   | 1.00 (0.82–1.22)        | 1.000   |
| <b>III. Patient–provider communication</b>                                             |                         |         |                         |         |                         |         |
| PC provider gives an opportunity to ask questions                                      | 1.10 (0.93–1.30)        | 0.249   | 0.76 (0.48–1.16)        | 0.199   | 0.91 (0.72–1.14)        | 0.405   |
| PC provider explains things in a way that is easy to understand                        | 1.16 (0.96–1.41)        | 0.124   | 1.35 (0.82–2.20)        | 0.235   | 0.82 (0.66–1.02)        | 0.074   |
| <b>IV. Technical quality and solving problems</b>                                      |                         |         |                         |         |                         |         |
| PC provider knows relevant information about the patient’s medical history             | 0.98 (0.83–1.15)        | 0.764   | <b>1.47 (1.03–2.12)</b> | 0.036   | 1.24 (0.97–1.58)        | 0.085   |
| PC provider advises about healthy lifestyles (nutrition, physical activity, stressors) | 0.93 (0.80–1.08)        | 0.343   | 1.12 (0.88–1.44)        | 0.351   | 1.02 (0.85–1.21)        | 0.852   |
| Preventive exams up to date                                                            | 0.96 (0.82–1.13)        | 0.655   | 0.93 (0.71–1.22)        | 0.629   | 1.08 (0.87–1.35)        | 0.489   |
| PC provider solves most of the patient’s health problems                               | <b>1.21 (1.02–1.43)</b> | 0.030   | 1.21 (0.75–1.94)        | 0.428   | 1.00 (0.78–1.26)        | 0.976   |
| <b>V. Care coordination</b>                                                            |                         |         |                         |         |                         |         |
| PC provider helps to coordinate care with other physicians or sources of care          |                         |         |                         |         |                         |         |
| Yes                                                                                    | 1.06 (0.92–1.23)        | 0.424   | <b>1.53 (1.19–1.98)</b> | 0.001   | 1.17 (0.96–1.42)        | 0.118   |
| No                                                                                     | Ref                     |         | Ref                     |         | Ref                     |         |
| It was not necessary to coordinate care                                                | <b>1.24 (1.00–1.54)</b> | 0.049   | <b>1.91 (1.34–2.73)</b> | <0.001  | 1.02 (0.65–1.59)        | 0.926   |
| <b>Covariates</b>                                                                      |                         |         |                         |         |                         |         |
| <b>Female</b>                                                                          | <b>0.81 (0.69–0.94)</b> | 0.005   | <b>0.78 (0.61–0.98)</b> | 0.037   | 0.94 (0.78–1.14)        | 0.551   |
| <b>Age (years)</b>                                                                     |                         |         |                         |         |                         |         |
| 18–25                                                                                  | Ref                     |         | Ref                     |         | Ref                     |         |
| 26–45                                                                                  | 1.08 (0.92–1.26)        | 0.374   | <b>0.65 (0.51–0.83)</b> | 0.001   | <b>0.72 (0.60–0.88)</b> | 0.001   |
| 46–59                                                                                  | 1.19 (0.97–1.46)        | 0.100   | <b>0.53 (0.36–0.78)</b> | 0.001   | <b>0.65 (0.50–0.85)</b> | 0.002   |
| ≥60                                                                                    | 0.95 (0.74–1.22)        | 0.682   | <b>0.19 (0.04–0.80)</b> | 0.024   | <b>0.48 (0.32–0.74)</b> | 0.001   |
| <b>Education</b>                                                                       |                         |         |                         |         |                         |         |
| Elementary school or less                                                              | Ref                     |         | Ref                     |         | Ref                     |         |
| Secondary school                                                                       | 0.95 (0.79–1.15)        | 0.619   | 0.92 (0.66–1.28)        | 0.615   | <b>1.41 (1.06–1.89)</b> | 0.019   |
| College                                                                                | 0.97 (0.80–1.17)        | 0.758   | 1.22 (0.84–1.78)        | 0.299   | <b>1.49 (1.12–1.98)</b> | 0.006   |
| Not specified                                                                          | 1.07 (0.82–1.39)        | 0.611   | 1.57 (0.81–3.05)        | 0.181   | <b>1.38 (1.01–1.90)</b> | 0.044   |
| <b>Health insurance</b>                                                                |                         |         |                         |         |                         |         |
| Government                                                                             | Ref                     |         | Ref                     |         | Ref                     |         |
| Social security                                                                        | N/A                     |         | 1.13 (0.85–1.50)        | 0.390   | 1.02 (0.76–1.39)        | 0.876   |
| Private                                                                                | 1.06 (0.97–1.26)        | 0.120   | 1.15 (0.82–1.60)        | 0.416   | 1.03 (0.74–1.44)        | 0.853   |

(Continued)

Table 7. (Continued)

| Domain and variable       | Jamaica<br><i>n</i> = 1,140 |                 | Mexico<br><i>n</i> = 1,182 |                 | Panama<br><i>n</i> = 1,083 |                 |
|---------------------------|-----------------------------|-----------------|----------------------------|-----------------|----------------------------|-----------------|
|                           | aPR (95% CI)                | <i>p</i> -Value | aPR (95% CI)               | <i>p</i> -Value | aPR (95% CI)               | <i>p</i> -Value |
| Chronic disease diagnosis | <b>0.68 (0.59–0.78)</b>     | <0.001          | <b>0.54 (0.38–0.76)</b>    | <0.001          | <b>0.75 (0.59–0.97)</b>    | 0.026           |

Multiple Poisson regression models double-weighted by survey and stabilized inverse variance weights and stratified by country. All prevalence ratios were adjusted by the covariates presented in this table. Bold values highlight the statistically significant aPRs.

aPR, adjusted prevalence ratio; PC, primary care.

<https://doi.org/10.1371/journal.pmed.1002673.t007>

PC provider who solves most health problems was associated with better SRH in Colombia and in Jamaica. Taken as a whole, the results suggest that the domains of patient-centered PC are all important to patient-reported health, but that the individual components with greatest relevance vary across settings. These characteristics shape the definition, goals, and priorities of PC. The attainment of PC goals requires easy communication with the clinic or provider to guarantee timely access to care, coordination among healthcare providers to assure continuity of care, and the ability to solve health-related problems. Previous studies found the importance of these experiences to patients [44,45], yet, to the best of our knowledge, our study is the first to find the association of these characteristics with very good or excellent SRH. Effective patient-centered communication was associated with improved health outcomes in several studies [46,47]. In our study, the opportunity to ask questions was significant only in Brazil.

The study has several limitations. First, it is an observational analysis of a cross-sectional survey, which does not allow making causal inferences or identifying the direction of the association between the study variables. Bidirectional relationships could be possible between better SRH and some healthcare experiences. For instance, on the one hand, people with poorer health are less likely to give the clinician credit for solving issues, and on the other hand, worse health problems are harder to solve. Second, due to the high prevalence of missing data, the analysis included IP weighting; therefore, we had to assume that the population with a regular PC clinic or doctor was exchangeable, conditional on covariates, with the population without a regular PC clinic or doctor; if this assumption was violated, the results would not be generalizable to those without a regular PC clinic or doctor. Third, in cross-national comparisons of survey data, cultural differences may lead to different interpretations of the questions being asked of respondents. For this reason, questionnaires had to be adapted for the characteristics of each country. Rather than focusing on the specifics of service provision in each country, this study aimed at identifying the broader roles of PC that may affect patient experience. Fourth, the results of our study are generalizable only to the urban populations of the analyzed 6 countries, as the samples were designed to represent national urban populations in each country. The results do not represent experiences of rural populations. Fifth, our findings cannot be generalized to other LMICs because of the different characteristics of their healthcare systems. Finally, information on type of employment and income was not collected by the survey; however, information on level of education and HI was available and included in this study.

### Conclusion

In the context of the 40th anniversary of the Declaration of Alma-Ata, there seems to be broad consensus that strengthening PC is an essential strategy to achieve universal health coverage and the Sustainable Development Goals. In parallel, there is a growing interest in the importance of patient-centered healthcare as a tool for improving outcomes. However, to date there



is little empirical cross-country evidence from LMICs that tests whether the main attributes of patient-centered PC are associated with better individual health. This study contributes to closing this gap by showing specific characteristics of patient-centered PC, and an overall summary measure of patient-centered PC performance, that are associated with better SRH in a sample representative of nearly 330 million people in 6 LAC countries. While the current study focused on self-reported cross-sectional data, the expansion of PC coverage in LAC countries and the increasing availability of administrative and clinical data associated with the introduction of electronic health records should allow for more longitudinal analyses to be conducted in the future.

## Supporting information

### S1 STROBE Checklist.

(DOC)

### S1 Table. Missing data by country.

(DOCX)

### S2 Table. Results of the tests for additive interactions: Relative excess risk due to interaction and 95% CI.

(DOCX)

## Acknowledgments

The opinions expressed in the article are the authors' own and do not necessarily reflect the views of the Inter-American Development Bank, its board of directors, or its technical advisers.

## Author Contributions

**Conceptualization:** Frederico Guanais, Svetlana V. Doubova, Hannah H. Leslie, Ricardo Perez-Cuevas, Ezequiel García-Elorrio, Margaret E. Kruk.

**Formal analysis:** Svetlana V. Doubova, Hannah H. Leslie.

**Methodology:** Frederico Guanais, Svetlana V. Doubova, Hannah H. Leslie, Margaret E. Kruk.

**Writing – original draft:** Frederico Guanais, Svetlana V. Doubova.

**Writing – review & editing:** Frederico Guanais, Svetlana V. Doubova, Hannah H. Leslie, Ricardo Perez-Cuevas, Ezequiel García-Elorrio, Margaret E. Kruk.

## References

1. Starfield B, Shi L, Macinko J. Contribution of primary care to health systems and health. *Milbank Q.* 2005; 83:457–502. <https://doi.org/10.1111/j.1468-0009.2005.00409.x> PMID: 16202000
2. World Health Organization. The world health report 2008—primary health care (now more than ever). Geneva: World Health Organization; 2008.
3. Starfield B. Primary care: an increasingly important contributor to effectiveness, equity, and efficiency of health services. *SESPAS report 2012. Gac Sanit.* 2012; 26(Suppl 1):20–6.
4. Kruk ME, Chukwuma A, Mbaruku G, Leslie HH. Variation in quality of primary-care services in Kenya, Malawi, Namibia, Rwanda, Senegal, Uganda and the United Republic of Tanzania. *Bull World Health Organ.* 2017; 95:408–18. <https://doi.org/10.2471/BLT.16.175869> PMID: 28603307
5. Levesque JF, Haddad S, Narayana D, Fournier P. Outpatient care utilization in urban Kerala, India. *Health Policy Plan.* 2006; 21:289–301. <https://doi.org/10.1093/heapol/czl013> PMID: 16790454

6. Scheffler E, Visagie S, Schneider M. The impact of health service variables on healthcare access in a low resourced urban setting in the Western Cape, South Africa. *Afr J Prim Health Care Fam Med*. 2015; 7:820. <https://doi.org/10.4102/phcfm.v7i1.820>
7. Hoff T, Weller W, DePuccio M. The patient-centered medical home: a review of recent research. *Med Care Res Rev*. 2012; 69:619–44. <https://doi.org/10.1177/1077558712447688> PMID: 22645100
8. Rathert C, Wyrwich MD, Boren SA. Patient-centered care and outcomes: a systematic review of the literature. *Med Care Res Rev*. 2013; 70:351–79. <https://doi.org/10.1177/1077558712465774> PMID: 23169897
9. Nielsen M, Buelt L, Patel K, Nichols LM. The patient-centered medical home's impact on cost and quality: annual review of evidence 2014–2015. Washington (DC): Patient-Centered Primary Care Collaborative; 2016 [cited 2018 Sep 18]. Available from: <https://www.pcpcc.org/resource/patient-centered-medical-homes-impact-cost-and-quality-2014-2015>.
10. Doubova SV, Guanais FC, Pérez-Cuevas R, Canning D, Macinko J, Reich MR. Attributes of patient-centered primary care associated with the public perception of good healthcare quality in Brazil, Colombia, Mexico and El Salvador. *Health Policy Plan*. 2016; 31:834–43. <https://doi.org/10.1093/heapol/czv139> PMID: 26874326
11. Shi L, Macinko J, Starfield B, Xu J, Regan J, Politzer R, et al. Primary care, infant mortality, and low birth weight in the states of the USA. *J Epidemiol Community Health*. 2004; 58:374–80. <https://doi.org/10.1136/jech.2003.013078> PMID: 15082734
12. Macinko J, Guanais FC, de Fátima M, de Souza M. Evaluation of the impact of the Family Health Program on infant mortality in Brazil, 1990–2002. *J Epidemiol Community Health*. 2006; 60:13–9.
13. Wang W, Shi L, Yin A, Mao Z, Maitland E, Nicholas S, et al. Contribution of primary care to health: an individual level analysis from Tibet, China. *Int J Equity Health*. 2015; 14:107. <https://doi.org/10.1186/s12939-015-0255-y> PMID: 26616447
14. Castaño-Vergara DM, Cardona-Arango D. Perception of state of health and associated factors in older adult. *Rev Salud Publica (Bogota)*. 2015; 17:171–83.
15. Jylha M. What is self-rated health and why it does predict mortality? Towards a unified conceptual model. *Soc Sci Med*. 2009; 69:307–16. <https://doi.org/10.1016/j.socscimed.2009.05.013> PMID: 19520474
16. DeSalvo KB, Bloser N, Reynolds K, He J, Muntner P. Mortality prediction with a single general self-rated health question. *J Gen Intern Med*. 2006; 21:267–75. <https://doi.org/10.1111/j.1525-1497.2005.00291.x> PMID: 16336622
17. Falk H, Skoog I, Johansson L, Guerchet M, Mayston R, Hörder H, et al. Self-rated health and its association with mortality in older adults in China, India and Latin America—a 10/66 Dementia Research Group study. *Age Ageing*. 2017; 46:932–9. <https://doi.org/10.1093/ageing/afx126> PMID: 28985329
18. Xu F, Johnston JM. Self-rated health and health service utilization: a systematic review. *Int J Epidemiol*. 2015; 44(Suppl 1):i180. <https://doi.org/10.1093/ije/dyv096.267>
19. Shi L, Starfield B. Primary care, income inequality, and self-rated health in the United States: a mixed-level analysis. *Int J Health Serv*. 2000; 30:541–55. <https://doi.org/10.2190/N4M8-303M-72UA-P1K1> PMID: 11109180
20. Shi L, Starfield B, Politzer R, Regan J. Primary care, self-rated health, and reductions in social disparities in health. *Health Serv Res*. 2002; 37:529–50. <https://doi.org/10.1111/1475-6773.t01-1-00036> PMID: 12132594
21. Sung NJ, Markuns JF, Park KH, Kim K, Lee H, Lee JH. Higher quality primary care is associated with good self-rated health status. *Fam Pract*. 2013; 30:568–75. <https://doi.org/10.1093/fampra/cmt021> PMID: 23759366
22. Macinko J, Guanais FC, Mullachery P, Jimenez G. Gaps in primary care and health system performance in six Latin American and Caribbean countries. *Health Aff (Millwood)*. 2016; 35:1513–21.
23. Pérez-Cuevas R, Guanais FC, Doubova SV, Pinzón L, Tejerina L, Pinto Masis D, et al. Understanding public perception of the need for major change in Latin American healthcare systems. *Health Policy Plan*. 2017; 32:816–24. <https://doi.org/10.1093/heapol/czx020> PMID: 28335011
24. United Nations Population Division Department of Economic and Social Affairs. World population prospects: the 2017 revision. New York: United Nations Population Division; 2017.
25. Schoen C, Osborn R, Doty MM, Bishop M, Peugh J, Murukutla N. Toward higher-performance health systems: adults' health care experiences in seven countries, 2007. *Health Affairs (Millwood)*. 2007; 26:w717–34.
26. Starfield B, Shi L. The medical home, access to care, and insurance: a review of evidence. *Pediatrics*. 2004; 113(5 Suppl):1493–8. PMID: 15121917

27. Krol MW, de Boer D, Rademakers JJ, Delnoij DM. Overall scores as an alternative to global ratings in patient experience surveys; a comparison of four methods. *BMC Health Serv Res.* 2013; 13:479. <https://doi.org/10.1186/1472-6963-13-479> PMID: 24245726
28. Darviri C, Artemiadis AK, Tigani X, Alexopoulos EC. Lifestyle and self-rated health: a cross-sectional study of 3,601 citizens of Athens, Greece. *BMC Public Health.* 2011; 11:619. <https://doi.org/10.1186/1471-2458-11-619> PMID: 21816035
29. Södergren M, McNaughton SA, Salmon J, Ball K, Crawford DA. Associations between fruit and vegetable intake, leisure-time physical activity, sitting time and self-rated health among older adults: cross-sectional data from the WELL study. *BMC Public Health.* 2012; 12:551. <https://doi.org/10.1186/1471-2458-12-551> PMID: 22830932
30. Chan YY, Teh CH, Lim KK, Lim KH, Yeo PS, Kee CC, et al. Lifestyle, chronic diseases and self-rated health among Malaysian adults: results from the 2011 National Health and Morbidity Survey (NHMS). *BMC Public Health.* 2015; 15:754. <https://doi.org/10.1186/s12889-015-2080-z> PMID: 26246019
31. Wong R, Peláez M, Palloni A. Autoinforme de salud general en adultos mayores de América Latina y el Caribe: su utilidad como indicador. *Rev Panam Salud Publica.* 2005; 17:323–32. PMID: 16053642
32. Asfar T, Ahmad B, Rastam S, Mulloli TP, Ward KD, Maziak W. Self-rated health and its determinants among adults in Syria: a model from the Middle East. *BMC Public Health.* 2007; 7:177. <https://doi.org/10.1186/1471-2458-7-177> PMID: 17651491
33. Caetano SC, Silva CM, Vettore MV. Gender differences in the association of perceived social support and social network with self-rated health status among older adults: a population-based study in Brazil. *BMC Geriatr.* 2013; 13:122. <https://doi.org/10.1186/1471-2318-13-122> PMID: 24229389
34. Mavaddat N, Valderas JM, van der Linde R, Khaw KT, Kinmonth AL. Association of self-rated health with multimorbidity, chronic disease and psychosocial factors in a large middle-aged and older cohort from general practice: a cross-sectional study. *BMC Fam Pract.* 2014; 15:185. <https://doi.org/10.1186/s12875-014-0185-6> PMID: 25421440
35. von dem Knesebeck O, Dragano N, Siegrist J. Social capital and self-rated health in 21 European countries. *Psychosoc Med.* 2005; 2:Doc02.
36. Höfelmann DA, Garcia LP, de Freitas LR. Self-rated health in Brazilian adults and elderly: data from the National Household Sample Survey 2008. *Salud Publica Mex.* 2014; 56:603–11. PMID: 25604411
37. Spuling SM, Huxhold O, Wurm S. Predictors of self-rated health: does education play a role above and beyond age? *J Gerontol B Psychol Sci Soc Sci.* 2017; 72:415–24. <https://doi.org/10.1093/geronb/gbv057> PMID: 26307488
38. Seaman SR, White IR. Review of inverse probability weighting for dealing with missing data. *Stat Methods Med Res.* 2013; 22:278–95. <https://doi.org/10.1177/0962280210395740> PMID: 21220355
39. Barros AJ, Hirakata VN. Alternatives for logistic regression in cross-sectional studies: an empirical comparison of models that directly estimate the prevalence ratio. *BMC Med Res Methodol.* 2003; 3:21. <https://doi.org/10.1186/1471-2288-3-21> PMID: 14567763
40. VanderWeele TJ, Knol MJ. A tutorial on interaction. *Epidemiol Methods* 2014; 3:33–72.
41. Allison PD. Fixed effects regression models. London: Sage; 2009.
42. Hernán MA, Robins JM. Causal inference. Boca Raton (FL): Chapman & Hall/CRC; 2015.
43. Jenkinson C, Coulter A, Bruster S, Richards N, Chandola T. Patients' experiences and satisfaction with health care: results of a questionnaire study of specific aspects of care. *Qual Saf Health Care.* 2002; 11:335–9. <https://doi.org/10.1136/qhc.11.4.335> PMID: 12468693
44. Wong ST, Watson DE, Young E, Regan S. What do people think is important about primary healthcare? *Healthcare Policy.* 2008; 3:89–104. PMID: 19305771
45. Wong ST, Regan S. Patient perspectives on primary health care in rural communities: effects of geography on access, continuity and efficiency. *Rural Remote Health.* 2009; 9:1142. PMID: 19298094
46. Stewart MA. Effective physician-patient communication and health outcomes: a review. *CMAJ.* 1995; 152:1423–33. PMID: 7728691
47. Stewart M, Brown J, Donner A, McWhinney IR, Oates J, Weston WW, et al. The impact of patient-centered care on outcomes. *J Fam Pract.* 2000; 49:796–804. PMID: 11032203
